# Supplementary material
Source: PubMed Central journal article supplement (PMC8042569)
Supplement: jamainternmed-e210991-s003.pdf [file jamainternmed-e210991-s003.pdf]

## Data Sharing Statement

Nelligan. Effects of a Self-directed Web-based Strengthening Exercise and Physical Activity Program Supported by Automated Text Messages for People With Knee Osteoarthritis. *JAMA Intern Med*. Published April 12, 2021. doi:10.1001/jamainternmed.2021.0991

### Data

**Data available:** Yes

**Data types:** Deidentified participant data

**How to access data:** available by request on a case-by-case basis at the discretion of the corresponding author;

[rachel.nelligan@unimelb.edu.au](mailto:rachel.nelligan@unimelb.edu.au)

**When available:** With publication

### Supporting Documents

**Document types:** Informed consent form

**How to access documents:** Trial Registry.

<https://www.anzctr.org.au/Trial/Registration/TrialReview.aspx?id=375219&isReview=true>

**When available:** With publication

### Additional Information

**Who can access the data:** researchers whose proposed use of the data has been approved

**Types of analyses:** case-by-case basis at the discretion of the corresponding author such as meta-analysis

**Mechanisms of data availability:** with investigator support
